# Supplementary material
Source: PubMed Central journal article supplement (PMC1142418)

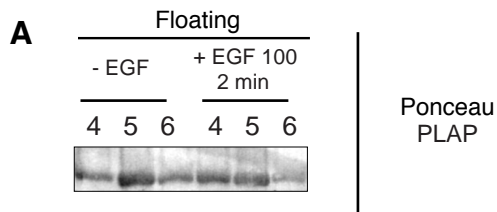

|          | no EGF<br>(a.u.) | EGF 100 ng<br>(a.u.) | no EGF<br>(norm. a.u.) | EGF 100 ng<br>(norm. a.u.) |
|----------|------------------|----------------------|------------------------|----------------------------|
| PLAP     | 6961             | 6759                 | 1.0000                 | 1.0000                     |
| EGFR     | 688              | 6836                 | 0.0988                 | 1.0114                     |
| Eps15    | 2465             | 6564                 | 0.3541                 | 0.9711                     |
| AP2      | 1220             | 4786                 | 0.1752                 | 0.7081                     |
| Clathrin | 2956             | 6842                 | 0.4247                 | 1.0123                     |

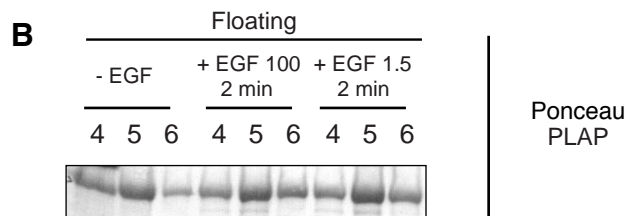

|          | no EGF<br>(a.u.) | EGF 1.5 ng<br>(a.u.) | EGF 100 ng<br>(a.u.) | no EGF<br>(norm. a.u.) | EGF 1.5 ng<br>(norm. a.u.) | EGF 100 ng<br>(norm. a.u.) |
|----------|------------------|----------------------|----------------------|------------------------|----------------------------|----------------------------|
| PLAP     | 17339            | 18100                | 17125                | 1.0000                 | 1.0000                     | 1.0000                     |
| EGFR     | 23423            | 39408                | 63914                | 1.3509                 | 2.1772                     | 3.7322                     |
| Eps15    | 35668            | 33452                | 45113                | 2.0571                 | 1.8482                     | 2.6343                     |
| AP2      | 8321             | 12006                | 15240                | 0.4799                 | 0.6633                     | 0.8899                     |
| Clathrin | 23928            | 31681                | 32787                | 1.3800                 | 1.7503                     | 1.9146                     |

**C**

|          | EGF 1.5 ng 37°C | EGF 100 ng 37°C | EGF 100 ng 4°C |
|----------|-----------------|-----------------|----------------|
| PLAP     | 1.0             | 1.0             | 1.0            |
| EGFR     | 1.6             | 2.8             | 10.2           |
| Eps15    | 0.9             | 1.3             | 2.7            |
| AP2      | 1.4             | 1.9             | 4.0            |
| Clathrin | 1.3             | 1.4             | 2.4            |

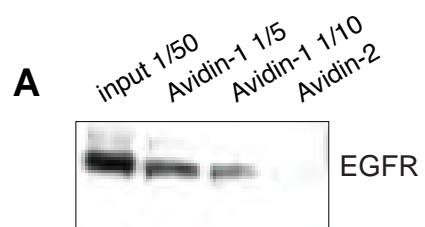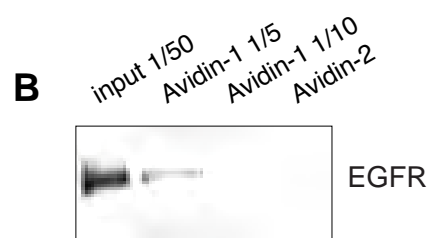

Supplement: mbc_E04-07-0596_1.pdf [file mbc_E04-07-0596_1.pdf]
